# Supplementary material for: Designer μ-oxo-bridged hypervalent iodine(iii) organocatalysts for greener oxidations
Source: Royal Society of Chemistry journal article supplement (doi:10.1039/c0cc03213a), 2010-01-01
Supplement: c0cc03213a.pdf [file c0cc03213a.pdf]

## *Supplementary Information*

### **Designer $\mu$ -oxo-bridged hypervalent iodine(III) organocatalysts for greener oxidations**

Toshifumi Dohi, Naoko Takenaga, Kei-ichiro Fukushima, Teruyoshi Uchiyama,

Daishi Kato, Shiro Motoo, Hiromichi Fujioka, and Yasuyuki Kita\*

*College of Pharmaceutical Sciences, Ritsumeikan University, 1-1-1 Nojihigashi, Kusatsu, Shiga,*

*525-8577, Japan*

E-mail: [kita@ph.ritsumei.ac.jp](mailto:kita@ph.ritsumei.ac.jp)

#### ***General Information***

$^1\text{H}$  NMR and  $^{13}\text{C}$  NMR spectra were recorded by a JEOL JMN-300 or EX-270 spectrometer in  $\text{CDCl}_3$  otherwise noted. Data are reported as follows: chemical shift in ppm ( $\delta$ ), multiplicity (s = singlet, d = doublet, t = triplet, q = quartet, br = broad singlet, m = multiplet), coupling constant (Hz), and integration. Infrared spectra (IR) were obtained using a Hitachi 270-50 spectrometer; absorptions are reported in reciprocal centimeters for strong and structurally important peaks. Mass spectra were obtained on a Shimadzu GCMS-QP 5000 instrument with ionization voltages of 70 eV. High resolution mass spectra and elemental analyses were performed by the Elemental Analysis Section of Osaka University.

#### ***Materials***

All solvents were obtained from commercial suppliers used without further purification. Peracetic acid (PAA), hexafluoroisopropanol (HFIP), and  $\text{PhI}(\text{OAc})_2$  (PIDA) are commercially available. The starting materials **3a-3k** were prepared from corresponding acid chlorides by condensation with methoxyamine hydrochloride or N-aminophthalimide.

### 1. Synthesis of bis(iodoarene) catalyst **2a**

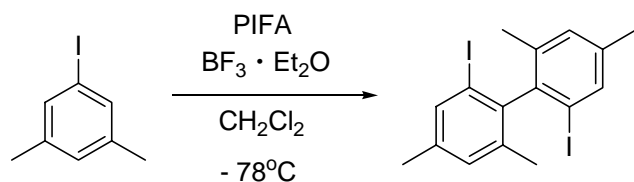

To a stirred solution of 3,5-dimethyliodobenzene (7 mmol) in CH<sub>2</sub>Cl<sub>2</sub> (8.75 ml) was added dropwise to a solution of PIFA (3.5 mmol) and BF<sub>3</sub> · Et<sub>2</sub>O (7 mmol) in CH<sub>2</sub>Cl<sub>2</sub> (8.75 ml) under nitrogen atmosphere at -78 °C. The reaction mixture was stirred at the same temperature for 5 h. After the reaction, the obtained mixture was quenched with saturated aqueous NaHCO<sub>3</sub> and the aqueous layer was extracted with CH<sub>2</sub>Cl<sub>2</sub>. The combined organic layers were washed with brine, and dried over anhydrous Na<sub>2</sub>SO<sub>4</sub>. After removal of the solvent, the residue was purified by column chromatography on silica gel (eluent: AcOEt/*n*-hexane) to give **2a** (1.02 g, 63%).

#### 2,2'-Diiodo-4,4',6,6'-tetramethylbiphenyl (**2a**)<sup>1)</sup>

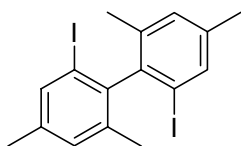

<sup>1</sup>H NMR (CDCl<sub>3</sub>): δ= 1.95 (s, 6H), 2.31 (s, 6H), 7.06 (s, 2H), 7.62 (s, 2H) ppm; <sup>13</sup>C NMR (CDCl<sub>3</sub>): δ= 20.4, 21.2, 100.7, 130.7, 136.9, 137.0, 139.0, 144.3 ppm; IR (KBr): 3014, 1599, 1541, 1035 cm<sup>-1</sup>

Bis(iodoarene) **2b** is commercially available compound. Other bis(iodoarene) catalysts, **2c** and **2d**, were obtained from iodination of the corresponding 2,2'-diamino-6,6'-disubstituted biphenyl, which were synthesized by literature procedures.<sup>2)</sup>

## 2. General experimental procedure for green oxidation using bis(iodoarene)catalyst **2a**

To a stirred solution of 2,2'-diiodo-4,4',6,6'-tetramethylbiphenyl **2a** (1.4 mg, 0.003 mmol) and amide **3a** (31.4 mg, 0.15 mmol) in HFIP (1.2 ml) and CH<sub>2</sub>Cl<sub>2</sub> (1.2 ml) was added 9% peracetic acid (0.23 ml, 0.3 mmol) under air. The reaction was performed at 35°C for 2.5 h. After the reaction, the solvents were removed under reduced pressure. The residue was extracted with CH<sub>2</sub>Cl<sub>2</sub>, washed with water and saturated aqueous NaHCO<sub>3</sub>, and then dried over anhydrous Na<sub>2</sub>SO<sub>4</sub>. After evaporation, almost pure product **4a** (27.0 mg, 93%) was obtained, which was purified by column chromatography on silica gel.

### 1-Methoxy-1-azaspiro[4.5]deca-6,9-diene-2,8-dione (**4a**)<sup>3)</sup>

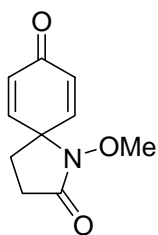

White crystals; mp 130-131 °C; <sup>1</sup>H NMR (CDCl<sub>3</sub>): δ 2.18 (t, *J* = 7.8 Hz, 2H), 2.56 (t, *J* = 7.8 Hz, 2H), 3.80 (s, 3H), 6.39 (d, *J* = 10.2 Hz, 2H), 6.84 (d, *J* = 10.2 Hz, 2H) ppm; <sup>13</sup>C NMR (CDCl<sub>3</sub>): δ 25.9, 27.5, 61.9, 65.3, 131.1, 147.2, 171.7, 184.4 ppm; IR (KBr): 2358, 2341, 1743, 1672, 1278, 711 cm<sup>-1</sup>; HRMS(FAB): Calcd for C<sub>10</sub>H<sub>11</sub>NO<sub>3</sub> (M + H)<sup>+</sup>: 194.0739. Found: 194.0816.

### 1-Methoxy-4,6-dimethyl-1-azaspiro[4.5]deca-6,9-diene-2,8-dione (**4b**)<sup>3)</sup>

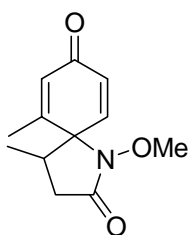

White crystals; mp 92-93 °C; <sup>1</sup>H NMR (CDCl<sub>3</sub>): δ 0.97 (d, *J* = 6.9 Hz, 3H), 2.10 (s, 3H), 2.22 (dd, *J* = 16.5, 10.2 Hz, 1H), 2.55-2.63 (m, 1H), 2.72 (dd, *J* = 16.5, 8.4 Hz, 1H), 3.80 (s, 3H), 6.34 (s, 1H), 6.44 (dd, *J* = 10.2, 2.1 Hz, 1H), 6.75 (d, *J* = 10.2 Hz, 1H) ppm; <sup>13</sup>C

NMR (CDCl<sub>3</sub>):  $\delta$  14.6, 18.5, 33.4, 34.8, 63.8, 68.6, 131.4, 131.9, 145.7, 155.7, 171.9, 184.5 ppm;

IR (KBr): 3500, 2972, 1714, 1666, 1286 cm<sup>-1</sup>; MS *m/z*: 221 (M<sup>+</sup>).

### 7-Acetyl-1-methoxy-1-azaspiro[4.5]deca-6,9-diene-2,8-dione (4c)<sup>3)</sup>

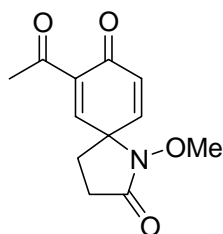

Colorless oil; <sup>1</sup>H NMR (CDCl<sub>3</sub>):  $\delta$  2.19-2.26 (m, 2H) 2.57 (s, 3H), 2.59-2.63

(m, 2H), 3.78 (s, 3H), 6.41 (d, *J* = 10.2 Hz, 1H), 6.87 (dd, *J* = 10.2, 3.0 Hz, 1H), 7.42 (d, *J* = 3.0

Hz, 1H) ppm; <sup>13</sup>C NMR (CDCl<sub>3</sub>):  $\delta$  25.6, 27.0, 30.5, 61.9, 65.0, 131.2, 139.2, 146.2, 150.6, 171.1,

181.9, 196.6 ppm; IR (KBr): 2939, 1693, 1666, 1359, 1257 cm<sup>-1</sup>; MS *m/z*: 235 (M<sup>+</sup>).

### 1-Methoxy-1-azaspiro[3.5]nona-5,8-diene-2,7-dione (4d)

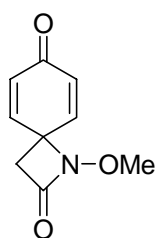

White crystals; mp 109-110 °C; <sup>1</sup>H NMR (CDCl<sub>3</sub>):  $\delta$  2.98 (s, 2H) 3.78 (s, 3H),

6.47 (d, *J* = 9.9 Hz, 2H), 6.93 (d, *J* = 9.9 Hz, 2H) ppm; <sup>13</sup>C NMR (CDCl<sub>3</sub>):  $\delta$  43.5, 60.4, 65.4,

132.3, 145.6, 162.1, 184.2 ppm; IR (KBr): 3523, 2941, 1770, 1666, 1402 cm<sup>-1</sup>; HRMS(FAB):

Calcd for C<sub>9</sub>H<sub>9</sub>NO<sub>3</sub> (M + H)<sup>+</sup>: 180.0582. Found: 180.0660.

### 1-Methoxy-1-azaspiro[5.5]undeca-7,10-diene-2,9-dione (4e)

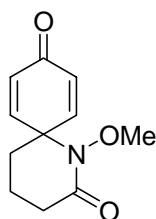

White crystals; mp 112.6-112.7 °C; <sup>1</sup>H NMR (CDCl<sub>3</sub>):  $\delta$  1.91-1.99 (m, 2H),

2.03-2.06 (m, 2H), 2.61 (d, *J* = 6.3 Hz, 2H), 3.74 (s, 3H), 6.34 (d, *J* = 9.9 Hz, 2H), 6.94 (d, *J* =

9.9 Hz, 2H) ppm;  $^{13}\text{C}$  NMR ( $\text{CDCl}_3$ ):  $\delta$  18.3, 33.2, 35.6, 63.6, 64.5, 130.0, 148.7, 168.1, 184.4 ppm; IR (KBr): 3506, 2939, 2358, 2341, 1668, 1392, 862  $\text{cm}^{-1}$ ; HRMS(FAB): Calcd for  $\text{C}_{11}\text{H}_{13}\text{NO}_3$  ( $\text{M} + \text{H}$ ) $^+$ : 208.0895. Found: 208.0968.

**1-(1,3-Dihydro- 1,3-dioxo-2H-isoindol-2-yl)-1-azaspiro[4.5]deca-6,9-diene-2,8-dione (4f)**

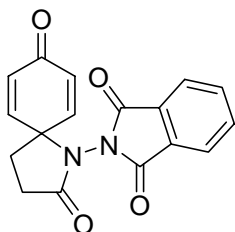

White crystals: mp 255-258  $^{\circ}\text{C}$ ;  $^1\text{H}$  NMR ( $\text{CDCl}_3$ ):  $\delta$  2.46 (t,  $J = 8.0$  Hz, 2H), 2.80 (t,  $J = 8.0$  Hz, 2H), 6.27 (dd,  $J = 10.1, 2.7$  Hz, 2H), 7.12 (dd,  $J = 10.1, 2.7$  Hz, 2H), 7.78-7.84 (m, 2H), 7.85-7.91 (m, 2H) ppm;  $^{13}\text{C}$  NMR ( $\text{CDCl}_3$ ):  $\delta$  21.6, 24.0, 57.5, 119.0, 124.5, 125.2, 129.9, 141.7, 159.4, 166.0, 179.1 ppm; IR (KBr): 1805, 1750, 1730, 1675, 715  $\text{cm}^{-1}$ ; HRMS(FAB): Calcd for  $\text{C}_{17}\text{H}_{12}\text{N}_2\text{O}_4$  ( $\text{M} + \text{H}$ ) $^+$ : 309.0797. Found: 309.0889; Anal. Calcd for  $\text{C}_{17}\text{H}_{12}\text{N}_2\text{O}_4$ : C, 66.23; H, 3.92; N, 9.09. Found: C, 66.00; H, 4.10; N, 9.15.

**1-Methoxy-3-dimethyl-1-azaspiro[4.5]deca-6,9-diene-2,8-dione (4g)**

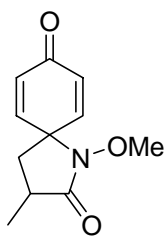

White crystals; mp 105.7-106.7  $^{\circ}\text{C}$ ;  $^1\text{H}$  NMR ( $\text{CDCl}_3$ ):  $\delta$  1.29 (d,  $J = 7.1$  Hz, 3H), 1.82 (dd,  $J = 13.2, 9.5$  Hz, 1H), 2.28 (dd,  $J = 13.2, 9.0$  Hz, 1H), 2.58-2.64 (m, 1H), 3.75 (s, 3H), 6.34 (d,  $J = 10.7$  Hz, 2H), 6.78 (d,  $J = 10.8$ , 2H) ppm;  $^{13}\text{C}$  NMR ( $\text{CDCl}_3$ ):  $\delta$  17.2, 32.8, 37.1, 61.6, 65.8, 131.4, 131.9, 147.4, 149.1, 174.7, 185.0 ppm; IR (KBr): 2938, 1719, 1672, 1250, 714  $\text{cm}^{-1}$ ; HRMS(FAB): Calcd for  $\text{C}_{11}\text{H}_{13}\text{NO}_3$  ( $\text{M} + \text{H}$ ) $^+$ : 208.0895. Found: 208.0977.

### Product 4h

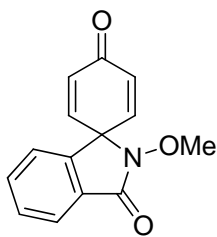

White crystals; mp 203.8-205.8 °C;  $^1\text{H}$  NMR ( $\text{CDCl}_3$ ):  $\delta$  3.96 (s, 3H), 6.55 (d,  $J = 9.5$  Hz, 2H), 6.67 (d,  $J = 9.5$  Hz, 2H), 7.23 (d,  $J = 7.6$  Hz, 1H), 7.59-7.65 (m, 2H), 7.95 (d,  $J = 7.6$  Hz, 1H) ppm;  $^{13}\text{C}$  NMR ( $\text{CDCl}_3$ ):  $\delta$  65.1, 66.1, 122.7, 124.9, 129.3, 130.1, 131.6, 133.5, 139.3, 145.6, 165.4, 184.6 ppm; IR (KBr): 3039, 2941, 1719, 1671, 1605  $\text{cm}^{-1}$ ; HRMS(FAB): Calcd for  $\text{C}_{14}\text{H}_{12}\text{NO}_3$  ( $\text{M} + \text{H}$ ) $^+$ : 242.0817. Found: 242.0830.

### Product 4i

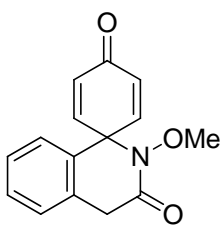

White crystals; mp 209-210 °C;  $^1\text{H}$  NMR ( $\text{CDCl}_3$ ):  $\delta$  3.79 (s, 3H), 3.87 (s, 2H), 6.34(d,  $J = 9.9$  Hz, 2H), 6.78(d,  $J = 9.9$  Hz, 2H), 7.05-7.29 (m, 4H) ppm;  $^{13}\text{C}$  NMR ( $\text{CDCl}_3$ ):  $\delta$  36.3, 64.8, 67.0, 126.3, 127.6, 128.5, 129.2, 129.3, 130.2, 147.5, 166.1, 184.7 ppm; IR (KBr): 2936, 1667, 1629, 1604, 1350, 1060, 683  $\text{cm}^{-1}$ ; MS  $m/z$ : 255 ( $\text{M}^+$ ); HRMS(FAB): Calcd for  $\text{C}_{15}\text{H}_{14}\text{NO}_3$  ( $\text{M} + \text{H}$ ) $^+$ : 256.0974. Found: 256.0970.

### Product 4j

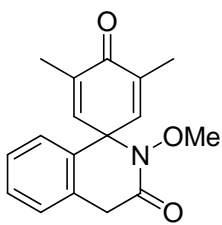

White crystals; mp 186-187 °C;  $^1\text{H}$  NMR ( $\text{CDCl}_3$ ):  $\delta$  1.91 (s, 6H), 3.75 (s, 3H), 3.83 (s, 2H), 6.53 (s, 2H), 6.97-7.27 (m, 4H) ppm;  $^{13}\text{C}$  NMR ( $\text{CDCl}_3$ ):  $\delta$  15.9, 36.4, 64.7, 67.2, 126.2, 127.4, 128.3, 128.9, 130.1, 131.0, 135.9, 142.6, 166.4, 186.3 ppm; IR (KBr): 2958, 2931, 1693, 1643, 1633, 1059, 761  $\text{cm}^{-1}$ ; MS  $m/z$ : 283 ( $\text{M}^+$ ); HRMS(FAB): Calcd for  $\text{C}_{17}\text{H}_{18}\text{NO}_3$

(M + H)<sup>+</sup>: 284.1287. Found: 284.1299.

### 1-(1,3-Dihydro-1,3-dioxo-2H-isoindol-2-yl)-1-azaspiro[4.5]deca-6,9-diene-2,8-dione (4f)

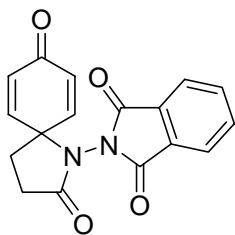

White crystals: mp 255-258 °C; <sup>1</sup>H NMR (CDCl<sub>3</sub>): δ 2.46 (t, *J* = 8.0 Hz, 2H), 2.80 (t, *J* = 8.0 Hz, 2H), 6.27 (dd, *J* = 10.1, 2.7 Hz, 2H), 7.12 (dd, *J* = 10.1, 2.7 Hz, 2H), 7.78-7.84 (m, 2H), 7.85-7.91 (m, 2H) ppm; <sup>13</sup>C NMR (CDCl<sub>3</sub>): δ 21.6, 24.0, 57.5, 119.0, 124.5, 125.2, 129.9, 141.7, 159.4, 166.0, 179.1 ppm; IR (KBr): 1805, 1750, 1730, 1675, 715 cm<sup>-1</sup>; HRMS(FAB): Calcd for C<sub>17</sub>H<sub>12</sub>N<sub>2</sub>O<sub>4</sub> (M + H)<sup>+</sup>: 309.0797. Found: 309.0889; Anal. Calcd for C<sub>17</sub>H<sub>12</sub>N<sub>2</sub>O<sub>4</sub>: C, 66.23; H, 3.92; N, 9.09. Found: C, 66.00; H, 4.10; N, 9.15.

### 3. Synthesis of *μ*-oxo-bridged reactive hypervalent iodine(III) compounds **1a**

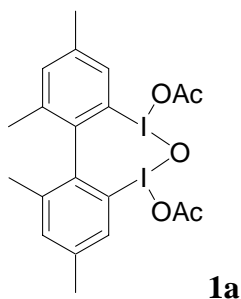

To a stirred solution of Selectfluor<sup>TM</sup> (2.69 g, 7.6 mmol) in MeCN (47.5 ml) was successively added AcOH (17.1 ml) and 2,2'-diiodo-4,4',6,6'-tetramethylbiphenyl **2a** (0.88 g, 1.9 mmol) under air atmosphere, and the mixture was stirred overnight at room temperature. After removal of MeCN under reduced pressure, the resulting residue was extracted with CH<sub>2</sub>Cl<sub>2</sub>, and then the organic solution was dried over anhydrous Na<sub>2</sub>SO<sub>4</sub>. After evaporation of the solvent, the crude solid **1a** was dissolved in minimal amount of CH<sub>2</sub>Cl<sub>2</sub>, which was added dropwise to a stirred hexane. The resulting suspension was filtered to give pure product **1a** (1.09 g, 96%).

The use of PAA instead of Selectfluor<sup>TM</sup> as oxidant also afforded **1a** in similar yield.

**1a**: White powder; mp 157 °C; <sup>1</sup>H NMR (CDCl<sub>3</sub>): δ 1.85 (s, 6H), 2.16 (s, 6H), 2.46 (s, 6H), 7.38 (s, 2H), 7.86 (s, 2H) ppm; <sup>13</sup>C NMR (CDCl<sub>3</sub>): δ 21.2 (x 2), 21.4, 127.0, 133.4, 135.2, 137.7, 139.2, 142.8, 177.6 ppm; IR (KBr): 1649, 1559, 1018, 750 cm<sup>-1</sup>.

A pure sample compatible for X-ray crystallographic analysis was obtained by recrystallization from acetonitrile-hexane. For crystallographic data of **1a** in CIF, see CCDC 779814.

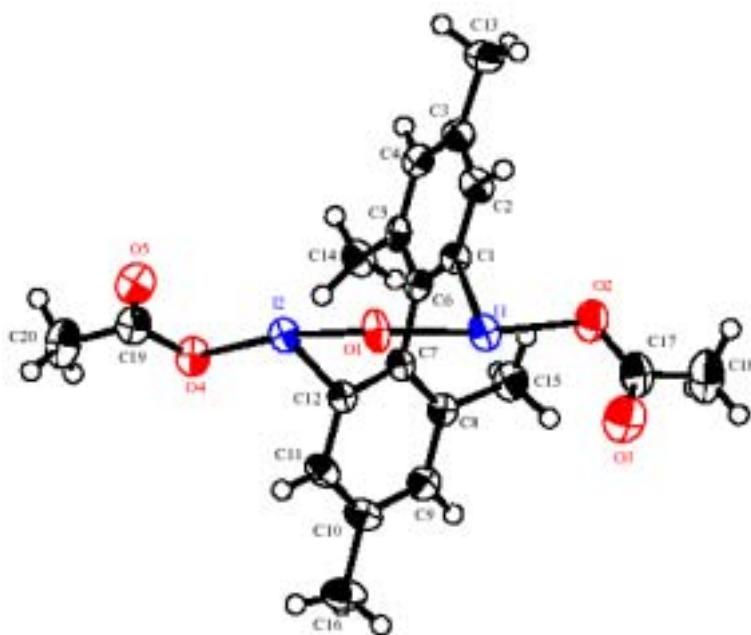

**Figure 1.** X-ray crystal structure of compound **1a**.



#### ***4. Stoichiometric reaction of 3a leading to 4a using the prepared 1a***

To a stirred solution of amide **3a** (10.5 mg, 0.05 mmol) in wet HFIP (0.5 ml) and CH<sub>2</sub>Cl<sub>2</sub> (0.5 ml) was added the prepared **1a** (14.9 mg, 0.025 mmol) at room temperature under air. After 3 h, the solvents were removed under reduced pressure. The organic layer was then washed with water, saturated aqueous NaHCO<sub>3</sub>, and dried over anhydrous Na<sub>2</sub>SO<sub>4</sub>. After evaporation, a crude product **4a** (8.7 mg, 90%) was obtained by the standard purification procedure.

#### ***References***

- 1) H. Tohma, M. Iwata, T. Maegawa and Y. Kita, *Tetrahedron Lett.*, 2002, **43**, 9241.
- 2) a) K. M. Gillespie, C. J. Sanders, P. O'Shaughnessy, I. Westmoreland, C. P. Thickitt and P. Scott, *J. Org. Chem.*, 2002, **67**, 3450. b) J. Sohn, B. Kiburz, L. Zhitao, D. Liu, A. Safi, M. C. Pirrung and J. Rudolph, *J. Med. Chem.*, 2003, **46**, 2580.
- 3) T. Dohi, A. Maruyama, Y. Minamitsuji, N. Takenaga and Y. Kita, *Chem. Commun.*, 2007, 1224.
